# Supplementary material for: Interpersonal Psychotherapy for Depression: A Meta-Analysis
Source: Atypon-hosted journal article supplement (doi:10.1176/appi.ajp.2010.10101411), 2011-03-02

**Figure S1. IPT versus other psychotherapies**

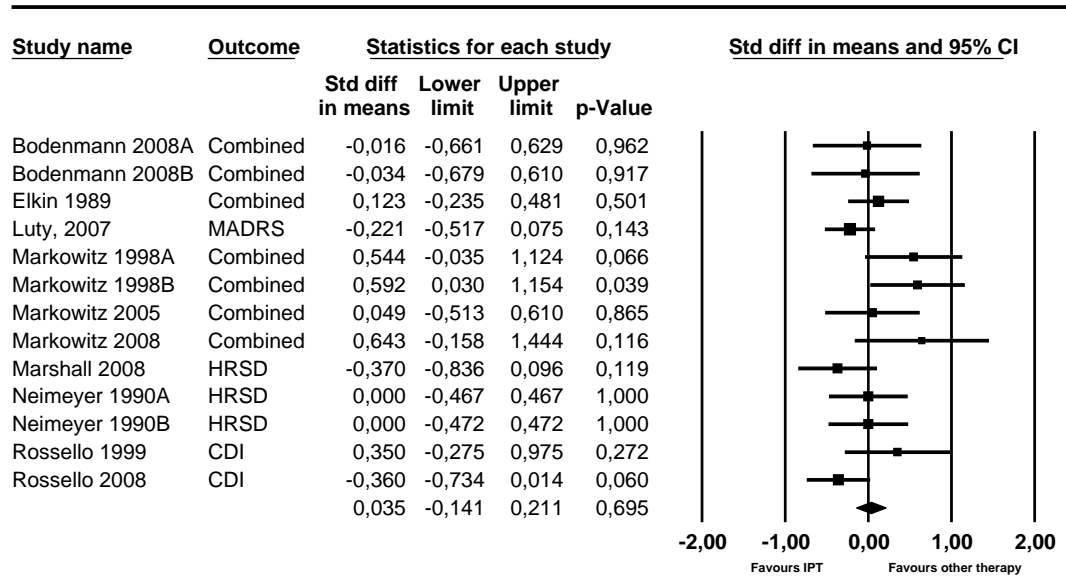

**Figure S2. IPT versus pharmacotherapy**

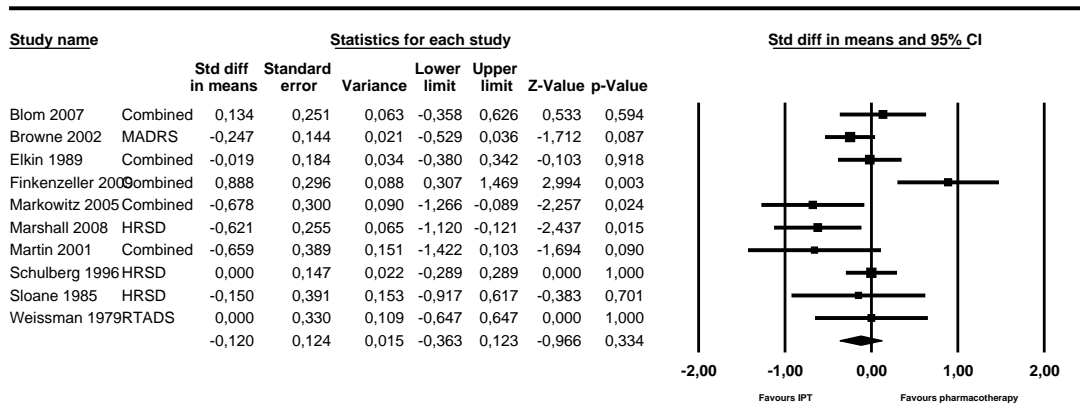

**Figure S3. Pharmacotherapy versus combined treatment of IPT and pharmacotherapy**

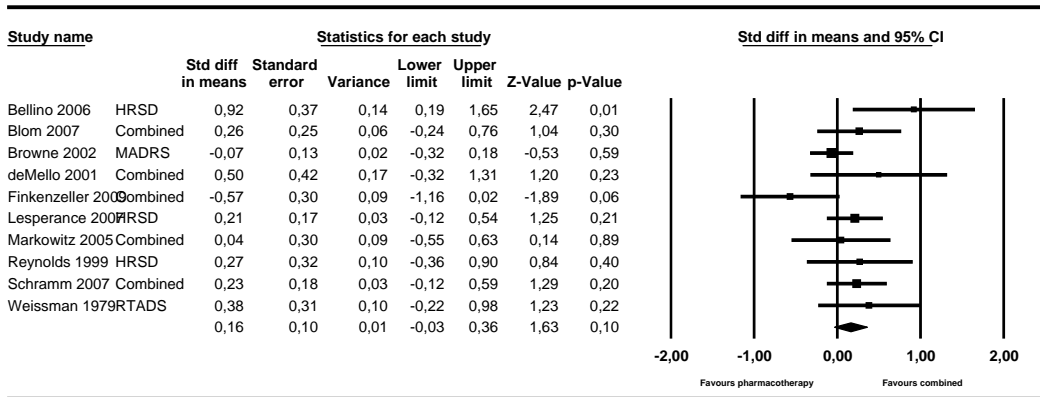

**Figure S4. Combined maintenance treatment versus pharmacotherapy alone**

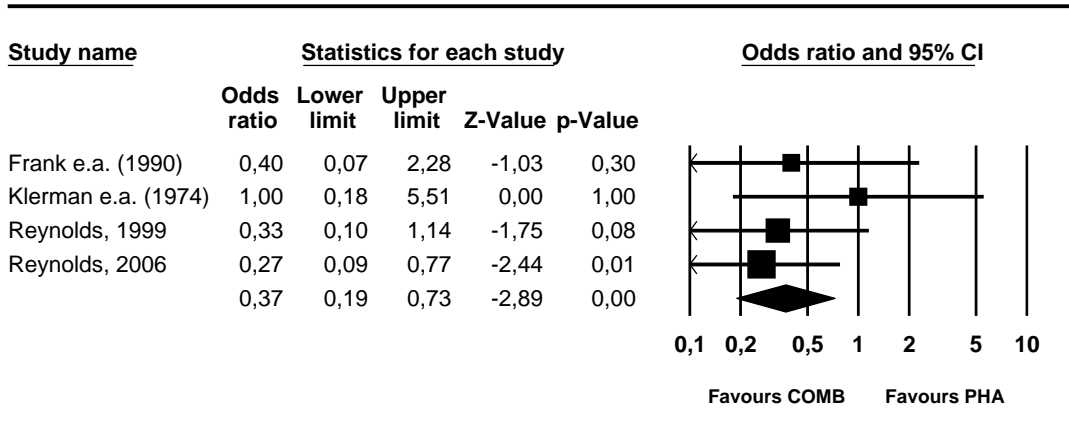

Supplement: ajp_168_06_581_01.pdf [file ajp_168_06_581_01.pdf]
